# Supplementary material for: Photocatalytic dye degradation properties of wafer level GaN nanowires by catalytic and self-catalytic approach using chemical vapor deposition
Source: Royal Society of Chemistry journal article supplement (doi:10.1039/c4ra03642e), 2014-01-01
Supplement: c4ra03642e1.pdf [file c4ra03642e1.pdf]

**Supporting Information**

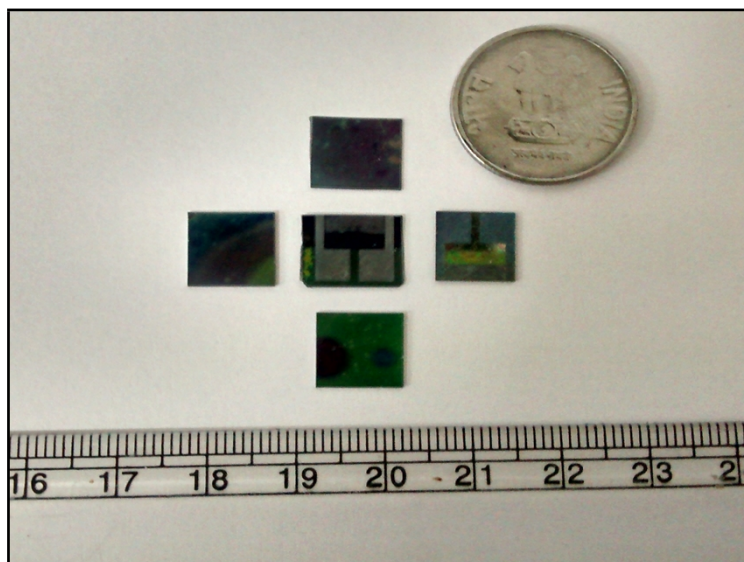

Figure S1: Optical images of as-grown GaN nanowires on Si(111) substrates by various approaches.

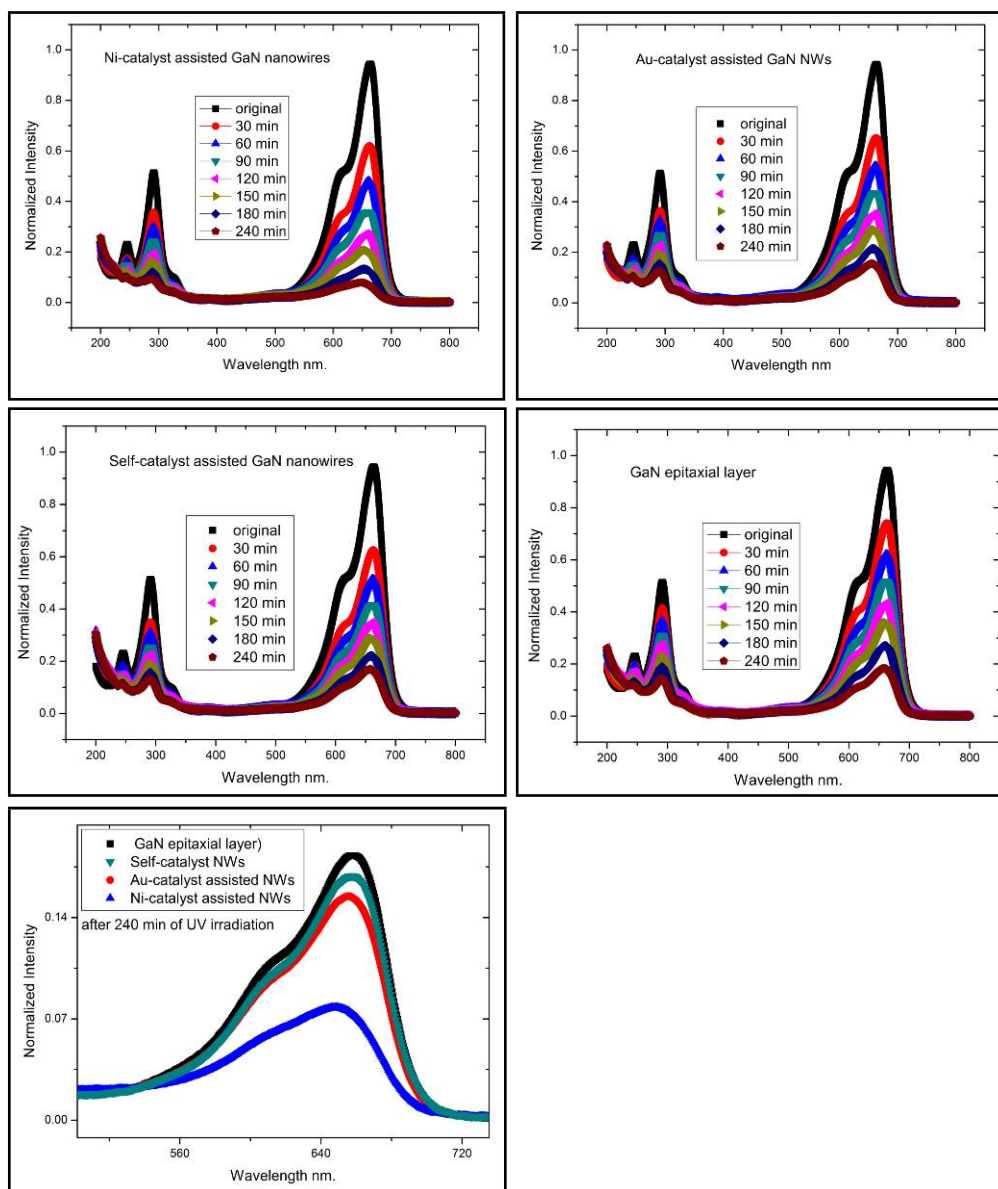

Figure S2 (a-d) shows the UV spectroscopy recorded during the photocatalytic dye degradation of Methylene Blue under UV irradiation using (a) Ni-catalyst assisted GaN nanowires (b) Au-catalyst assisted GaN nanowires (c) Self-catalyst assisted GaN nanowires (d) GaN epitaxial layer by MOCVD (e) comparison of various GaN nanowires after 240 minutes of UV irradiation.

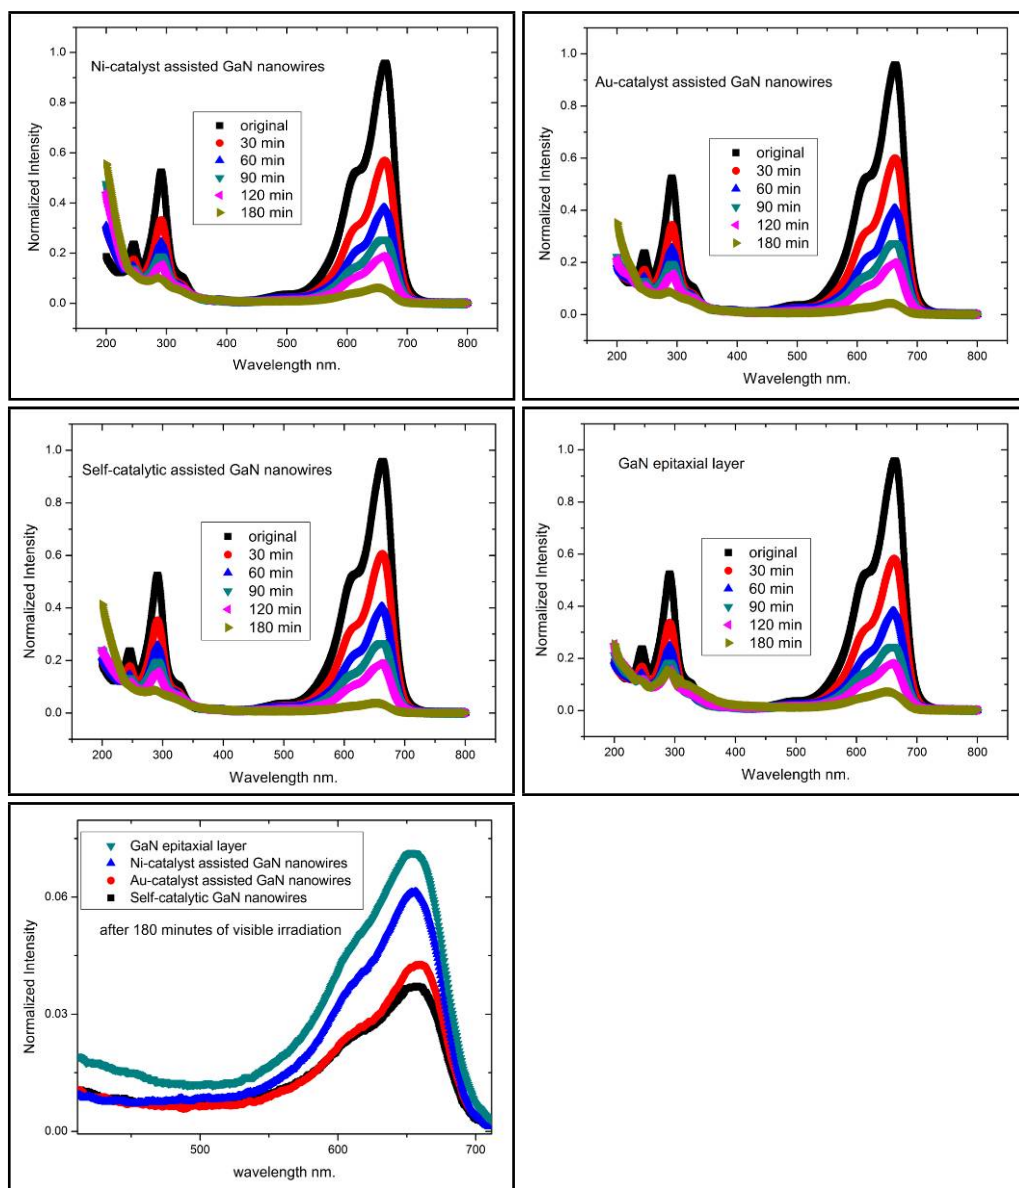

Figure S3 (a-d) shows the UV spectroscopy recorded during the photocatalytic dye degradation of Methylene Blue under Visible irradiation using (a) Ni-catalyst assisted GaN nanowires (b) Au-catalyst assisted GaN nanowires (c) Self-catalyst assisted GaN nanowires (d) GaN epitaxial layer by MOCVD (e) comparison of various GaN nanowires after 180 minutes of Visible light irradiation.
